# Supplementary material for: Organic aerosol components derived from 25 AMS data sets across Europe using a consistent ME-2 based source apportionment approach
Source: Copernicus journal article supplement (doi:10.5194/acp-14-6159-2014), 2014-06-23
Supplement: Supplementary file 1 [file acp-14-6159-2014-supplement.pdf]

Supplement of Atmos. Chem. Phys., 14, 6159–6176, 2014  
<http://www.atmos-chem-phys.net/14/6159/2014/>  
doi:10.5194/acp-14-6159-2014-supplement  
© Author(s) 2014. CC Attribution 3.0 License.

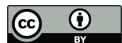

Atmospheric  
Chemistry  
and Physics  
Open Access

The logo for the journal Atmospheric Chemistry and Physics, featuring the letters 'EG' inside a stylized globe.

*Supplement of*

## **Organic aerosol components derived from 25 AMS data sets across Europe using a consistent ME-2 based source apportionment approach**

**M. Crippa et al.**

*Correspondence to:* A. S. H. Prévôt ([andre.prevot@psi.ch](mailto:andre.prevot@psi.ch))

## SI-1 Average chemical composition

Table SI-1: Mean concentrations (in  $\mu\text{g}/\text{m}^3$ ) of AMS chemical components for the EMEP/EUCAARI campaigns.

| Site                       | Spring 2008 |                              |                               |                              |                  | Fall 2008 |                              |                               |                              |                  | Spring 2009 |                              |                               |                              |                  |
|----------------------------|-------------|------------------------------|-------------------------------|------------------------------|------------------|-----------|------------------------------|-------------------------------|------------------------------|------------------|-------------|------------------------------|-------------------------------|------------------------------|------------------|
|                            | Org         | NO <sub>3</sub> <sup>-</sup> | SO <sub>4</sub> <sup>2-</sup> | NH <sub>4</sub> <sup>+</sup> | Chl <sup>-</sup> | Org       | NO <sub>3</sub> <sup>-</sup> | SO <sub>4</sub> <sup>2-</sup> | NH <sub>4</sub> <sup>+</sup> | Chl <sup>-</sup> | Org         | NO <sub>3</sub> <sup>-</sup> | SO <sub>4</sub> <sup>2-</sup> | NH <sub>4</sub> <sup>+</sup> | Chl <sup>-</sup> |
| <b>Barcelona</b>           |             |                              |                               |                              |                  |           |                              |                               |                              |                  | 8.20        | 3.60                         | 2.70                          | 1.60                         | 0.24             |
| <b>Cabauw</b>              | 4.20        | 2.50                         | 1.50                          | 1.70                         | 0.06             |           |                              |                               |                              |                  | 1.20        | 2.20                         | 1.00                          | 1.00                         | 0.15             |
| <b>Finokalia</b>           | 2.60        | 0.08                         | 5.00                          | 1.50                         | 0.01             |           |                              |                               |                              |                  | 1.40        | 0.05                         | 1.40                          | 0.40                         | 0.01             |
| <b>Helsinki</b>            |             |                              |                               |                              |                  |           |                              |                               |                              |                  | 2.90        | 0.90                         | 2.90                          | 0.80                         | 0.04             |
| <b>Hyytiälä</b>            |             |                              |                               |                              |                  | 0.80      | 0.10                         | 0.50                          | 0.20                         | 0.01             | 1.40        | 0.20                         | 1.40                          | 0.40                         | 0.01             |
| <b>Jungfraujoch</b>        | 0.66        | 0.27                         | 0.41                          | 0.21                         | 0.01             |           |                              |                               |                              |                  |             |                              |                               |                              |                  |
| <b>K-Puszt</b>             |             |                              |                               |                              |                  | 5.30      | 2.00                         | 2.70                          | 1.60                         | 0.10             |             |                              |                               |                              |                  |
| <b>Mace Head</b>           | 0.90        | 0.20                         | 0.80                          | 0.30                         | 0.02             |           |                              |                               |                              |                  | 0.80        | 0.60                         | 0.40                          | 0.30                         | 0.05             |
| <b>Melpitz</b>             | 6.90        | 0.70                         | 2.40                          | 0.90                         | 0.02             | 3.90      | 3.00                         | 1.70                          | 1.40                         | 0.10             | 1.40        | 3.10                         | 1.10                          | 1.40                         | 0.12             |
| <b>Montseny</b>            |             |                              |                               |                              |                  |           |                              |                               |                              |                  | 3.50        | 3.80                         | 1.50                          | 2.00                         | 0.11             |
| <b>Payerne</b>             |             |                              |                               |                              |                  | 5.40      | 2.70                         | 1.70                          | 1.60                         | 0.03             | 4.10        | 3.90                         | 1.10                          | 1.70                         | 0.08             |
| <b>Puijo</b>               |             |                              |                               |                              |                  | 0.90      | 0.10                         | 0.30                          | 0.10                         | 0.01             |             |                              |                               |                              |                  |
| <b>Puy de Dome</b>         |             |                              |                               |                              |                  | 1.76      | 0.82                         | 1.73                          | 1.52                         | 0.02             | 0.57        | 0.74                         | 0.32                          | 0.56                         | 0.03             |
| <b>San Pietro Capofume</b> | 3.80        | 2.90                         | 1.40                          | 1.40                         | 0.16             |           |                              |                               |                              |                  |             |                              |                               |                              |                  |
| <b>Vavihill</b>            |             |                              |                               |                              |                  | 3.70      | 3.20                         | 1.60                          | 1.60                         | 0.16             | 2.60        | 1.80                         | 0.90                          | 0.80                         | 0.09             |
| <b>Chilbolton</b>          |             |                              |                               |                              |                  |           |                              |                               |                              |                  | 2.50        | 3.00                         | 1.50                          | 1.50                         | 0.29             |
| <b>Harwell</b>             |             |                              |                               |                              |                  | 3.21      | 3.12                         | 1.72                          | 1.57                         | 0.11             |             |                              |                               |                              |                  |

## SI-2 Source apportionment results

**Table SI-2: Comparison of PMF and ME-2 results. Constrained factors in ME-2 are highlighted in red. The reference spectra were taken from Crippa et al. (2013) for the HOA and COA sources ( $\alpha$ -value=0.05), and from Ng et al. (2011) for the BBOA component ( $\alpha$ -value=0.3). For the PMF solutions of Barcelona, San Pietro Capofiume, Cabauw and Finokalia refer to Mohr et al. (2012), Saarikoski et al. (2012), Paglione et al. (2013), and Hildebrandt et al., (2010;2011), respectively.**

| Site                 |    | April/May 2008                                                |                              | Sep/Oct 2008                   |                          | Feb/Mar 2009                                 |                             |
|----------------------|----|---------------------------------------------------------------|------------------------------|--------------------------------|--------------------------|----------------------------------------------|-----------------------------|
|                      |    | PMF                                                           | ME2                          | PMF                            | ME2                      | PMF                                          | ME2                         |
| Barcelona            | ES |                                                               |                              |                                |                          | HR-PMF:LV-OOA, SV-OOA, HOA, BBOA, COA        | HOA,BBOA,COA,SV-OOA, LV-OOA |
| Cabauw               | NL | LV-OOA, SV-OOA,Hulis, HOA                                     | HOA, BBOA,SV-OOA, LV-OOA     |                                |                          | LV-OOA, SV-OOA, HOA, BBOA                    | HOA, BBOA, SV-OOA, LV-OOA   |
| Finokalia            | GR | LV-OOA, SV-OOA                                                | SV-OOA, LV-OOA, HOA,MSA      |                                |                          | OOA, LOA (OB-OA), AOA                        | -                           |
| Helsinki             | FI |                                                               |                              |                                |                          | HOA, BBOA, SV-OOA, LV-OOA                    | HOA,BBOA, SV-OOA, LV-OOA    |
| Hyytiälä             | FI |                                                               |                              | LV-OOA, SV-OOA                 | HOA,BBOA, SV-OOA, LV-OOA | LV-OOA, SV-OOA                               | HOA,BBOA, SV-OOA, LV-OOA    |
| Jungfrauoch          | CH | LV-OOA, OOA*, POA                                             | HOA,BBOA, LV-OOA             |                                |                          |                                              |                             |
| K-Pusztza            | HU |                                                               |                              | SV-OOA, LV-OOA, HOA, BBOA like | HOA,BBOA, SV-OOA, LV-OOA |                                              |                             |
| Mace Head            | IR | HOA,MSA,SV-OOA, LV-OOA                                        | HOA,BBOA,MSA, SV-OOA, LV-OOA |                                |                          | HOA, BBOA like, MSA like, LV-OOA             | HOA,BBOA,MSA, LV-OOA        |
| Melpitz              | DE | LV-OOA, SV-OOA                                                | HOA,SV-OOA, LV-OOA           | HOA like, LV-OOA, SV-OOA       | HOA,BBOA, SV-OOA, LV-OOA | POA, LV-OOA, SV-OOA                          | HOA, BBOA, SV-OOA, LV-OOA   |
| Montseny             | ES |                                                               |                              |                                |                          | POA, SV-OOA, LV-OOA (HR-PMF: HOA, BBOA, OOA) | HOA,BBOA, LV-OOA            |
| Payerne              | CH |                                                               |                              | OOA, POA                       | HOA,BBOA, SV-OOA, LV-OOA | POA, SV-OOA, LV-OOA                          | HOA,BBOA, SV-OOA, LV-OOA    |
| Puijo                | FI |                                                               |                              | OOA                            | HOA,OOA                  |                                              |                             |
| Puy de Dome          | FR |                                                               |                              | SV-OOA, LV-OOA                 | HOA,BBOA, SV-OOA, LV-OOA | LV-OOA, SV-OOA                               | HOA, BBOA, SV-OOA, LV-OOA   |
| San Pietro Capofiume | IT | LV-OOA, SV-OOA (HR PMF: HOA, BBOA, N-OA, OOA-a, OOA-b, OOA-c) | HOA,BBOA,SV-OOA, LV-OOA      |                                |                          |                                              |                             |
| Vavihill             | SE |                                                               |                              | HOA,BBOA, LV-OOA               | HOA,BBOA, LV-OOA         | HOA,SV-OOA, LV-OOA                           | HOA,BBOA, SV-OOA, LV-OOA    |
| Chilbolton           | UK |                                                               |                              |                                |                          | HOA,BBOA, SV-OOA, LV-OOA                     | HOA,BBOA, SV-OOA, LV-OOA    |
| Harwell              | UK |                                                               |                              |                                |                          | POA, LV-OOA                                  | HOA,BBOA, SV-OOA, LV-OOA    |

Table SI-2 shows the comparison between OA sources retrieved with the unconstrained PMF run and with our methodology. For some datasets high resolution data were available and the PMF algorithm was able to separate the same type of sources as in our approach (see for further details section SI-3). This is the case of Barcelona, Helsinki, Mace Head, Montseny and San Pietro Capofiume. For most of the other sites, we were able to identify more primary sources and/or determine the split between OOA components following the standardized procedure here introduced (e.g. Hyytiälä, Jungfrauoch, K-Pusztza, Melpitz, Puijo, Puy de Dome, Vavihill, Harwell). In the case of Chilbolton, the HOA MS was constrained to get better separation of the other

components, although both POA and SOA sources were retrieved by the unconstrained run too.

**Table SI-3: Correlation matrix of the OA factors and their tracers**

Table SI-3 reports the correlation ( $R^2$ ) between the time series of the OA sources and available tracers. HOA correlates with black carbon measurements, BBOA with the fraction of organic at mass 60, while SV-OOA and LV-OOA are compared with  $\text{NO}_3$  and  $\text{SO}_4$ , respectively.

| $R^2$                          | HOA vs. BC | BBOA vs. org60 | SV-OOA vs. $\text{NO}_3$ | LV-OOA vs. $\text{SO}_4$ |
|--------------------------------|------------|----------------|--------------------------|--------------------------|
| <b>Barcelona</b>               | 0.7        | 0.42           | 0.37                     | 0.61                     |
| <b>Cabauw 2008</b>             | 0.68       | 0.81           | 0.27                     | 0.5                      |
| <b>Cabauw 2009</b>             | 0.43       | 0.82           | 0.75                     | 0.67                     |
| <b>Chilbolton spring 2009</b>  | 0.82       | 0.79           | 0.22                     | 0.24                     |
| <b>Finokalia 2008</b>          | -          | -              | 0.11                     | 0.74                     |
| <b>Helsinki 2009</b>           | -          | 0.76           | 0.07                     | 0.58                     |
| <b>Hyytiälä 2008</b>           | 0.72       | 0.9            | 0.29                     | 0.36                     |
| <b>Hyytiälä 2009</b>           | 0.66       | 0.65           | 0.11                     | 0.74                     |
| <b>Jungfraujoch 2008</b>       | -          | 0.71           | 0.79                     | -                        |
| <b>K-Pusztá 2008</b>           | -          | 0.87           | 0.19                     | 0.64                     |
| <b>Mace Head 2008</b>          | -          | 0.74           | -                        | -                        |
| <b>Mace Head 2009</b>          | -          | 0.98           | 0.6                      | 0.81                     |
| <b>Melpitz spring 2008</b>     | -          | -              | 0.22                     | 0.58                     |
| <b>Melpitz fall 2008</b>       | 0.33       | 0.8            | -                        | 0.5                      |
| <b>Melpitz spring 2009</b>     | 0.74       | 0.8            | 0.27                     | 0.34                     |
| <b>Montseny</b>                | -          | 0.64           | -                        | 0.74                     |
| <b>Payerne fall 2008</b>       | -          | 0.4            | 0.14                     | 0.57                     |
| <b>Payerne spring 2009</b>     | -          | 0.87           | 0.12                     | 0.54                     |
| <b>Puijo</b>                   | -          | -              | -                        | 0.5                      |
| <b>Puy de Dome fall 2008</b>   | 0.77       | 0.41           | 0.57                     | 0.54                     |
| <b>Puy de Dome spring 2009</b> | -          | 0.97           | 0.93                     | 0.11                     |
| <b>San Pietro Capofiume</b>    | -          | 0.81           | 0.49                     | 0.11                     |
| <b>Vavihill fall 2008</b>      | -          | 0.23           | -                        | 0.58                     |
| <b>Vavihill spring 2009</b>    | -          | 0.54           | 0.14                     | 0.41                     |

**Table SI-4: Measurement sites location and classification. Measurement sites are listed from North to South**

| <b>Measurement site</b> | <b>Longitude</b> | <b>Latitude</b> | <b>Type of site</b> |
|-------------------------|------------------|-----------------|---------------------|
| Puijo                   | 27.6504          | 62.9023         | Rural               |
| Hyytiälä                | 24.2833          | 62.85           | Remote              |
| Helsinki                | 24.966           | 60.203          | Urban               |
| Vavihill                | 13.15            | 56.0167         | Rural               |
| Mace Head               | -9.6             | 53.333          | Remote              |
| Cabauw                  | 4.933            | 51.967          | Rural               |
| Chilbolton              | -1.317           | 51.567          | Rural               |
| Melpitz                 | 12.9             | 51.533          | Rural               |
| Harwell                 | -1.438           | 51.145          | Rural               |
| K-Pusza                 | 19.58            | 46.9667         | Rural               |
| Payerne                 | 6.95             | 46.8            | Rural               |
| Jungfrauoch             | 7.9833           | 46.5667         | High altitude       |
| Puy de Dome             | 2.5              | 45.5            | High altitude       |
| San Pietro Capofiume    | 11.6489          | 44.6539         | Rural               |
| Montseny                | 2.21             | 41.46           | Rural               |
| Barcelona               | 2.116            | 41.39           | Urban               |
| Finokalia               | 25.667           | 35.3167         | Remote              |

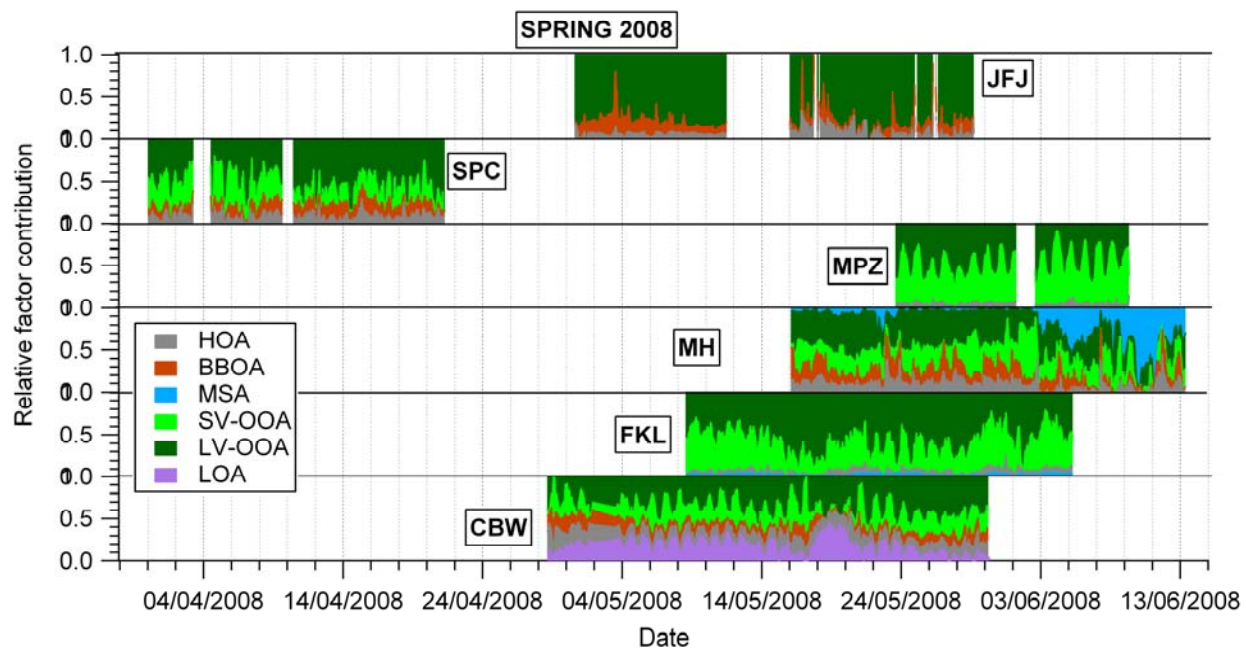

**Fig. SI-2.1: Temporal variation of the relative contributions of organic aerosol sources during the spring 2008 campaigns.**

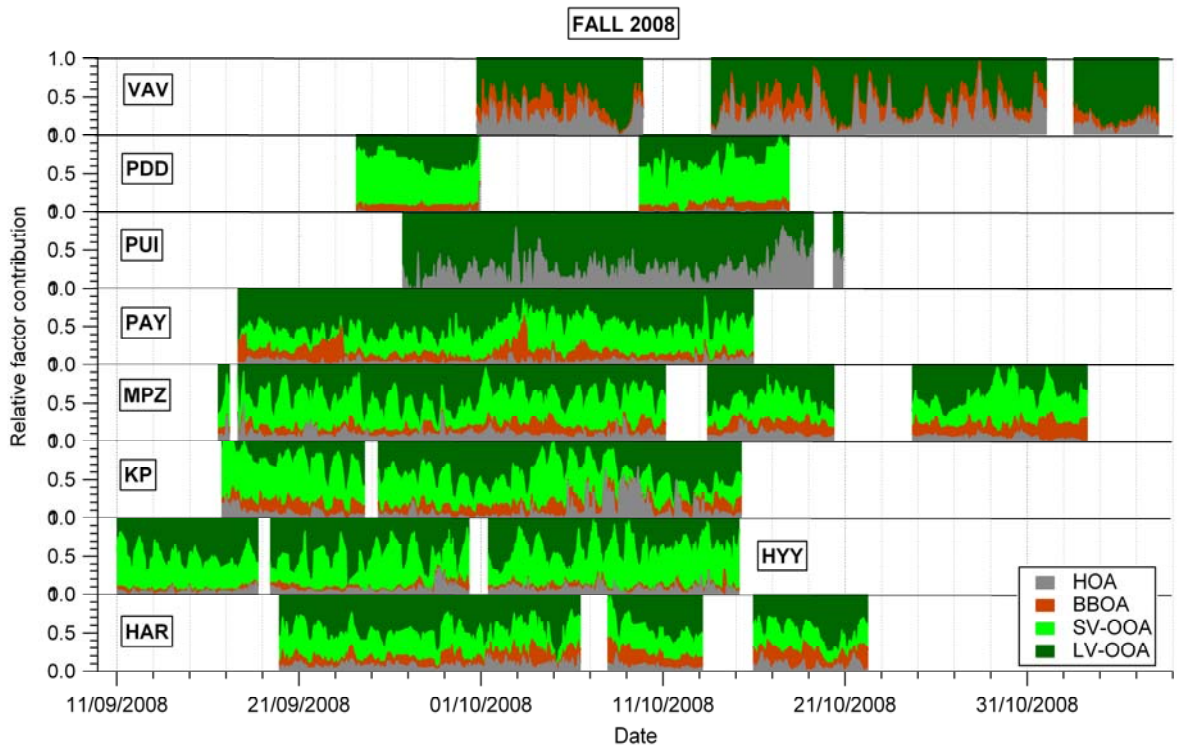

**Fig. SI-2.2: Temporal variation of the relative contributions of organic aerosol sources during the fall 2008 campaigns.**

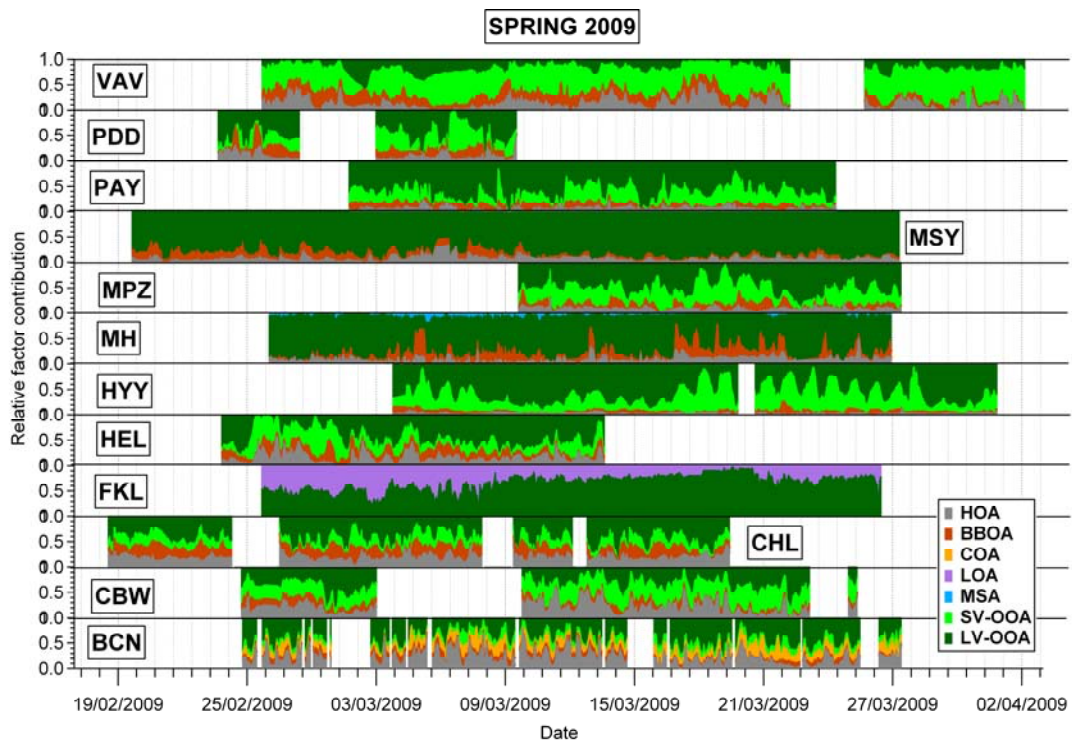

**Fig. SI-2.3: Temporal variation of the relative contributions of organic aerosol sources during the spring 2009 campaigns.**



### **SI-3 Comparison of results from different source apportionment methods**

In this section the comparison between source apportionment solutions retrieved with our standardized method and UMR/HR-PMF results available for some field campaigns is reported. In our work we showed the possibility to use ME-2 to extract more information from the UMR spectra that is often not otherwise possible with unconstrained UMR PMF and the comparison to more information-rich HR PMF is only meant as one assessment of how well it works. The motivation of our work is due to the fact that often HR spectra are not available (e.g. in many air quality monitoring stations ACSMs, etc. are deployed and not HR-AMS) and thus the utility/need for this method.

Comparing our ME-2 solutions with HR-PMF results shows that our source apportionment procedure produces quite similar results with UMR/HR-PMF in the case of Montseny (Figs. SI-3.1), although it was necessary to consider a 8-factor HR-PMF solution in order to get an HOA MS and merge all the OOA contributing factors into one single component. However, Fig. SI-3.2 highlights some issues with the quantification of OA sources in Barcelona, in fact despite the good agreement in terms of temporal correlations for all sources between the two methods, the slopes of the linear fit look quite different. A slope of 1.9 is found for HOA, which appears to be underestimated by our approach, while more comparable results are found for COA (slope 1.09). This is possibly due to the exact attribution of the reduced ions at mass 41, 43, 55 and 57 to the HOA MS and the oxygenated part to COA by the HR-PMF making use of the high resolution information. On the other hand, both BBOA and SV-OOA are underestimated by our methodology while LV-OOA is here overestimated. This underlines the uncertainty associated with the attribution of specific masses like  $m/z$  43 and  $m/z$  44 to BBOA and to the oxygenated components, which are not characterized by constant mass spectra over the world and the season. Some discrepancies are also observed for the Cabauw case (Fig. SI-3.3) since our solution additionally includes a BBOA factor compared to the work of Paglione et al. (2013).

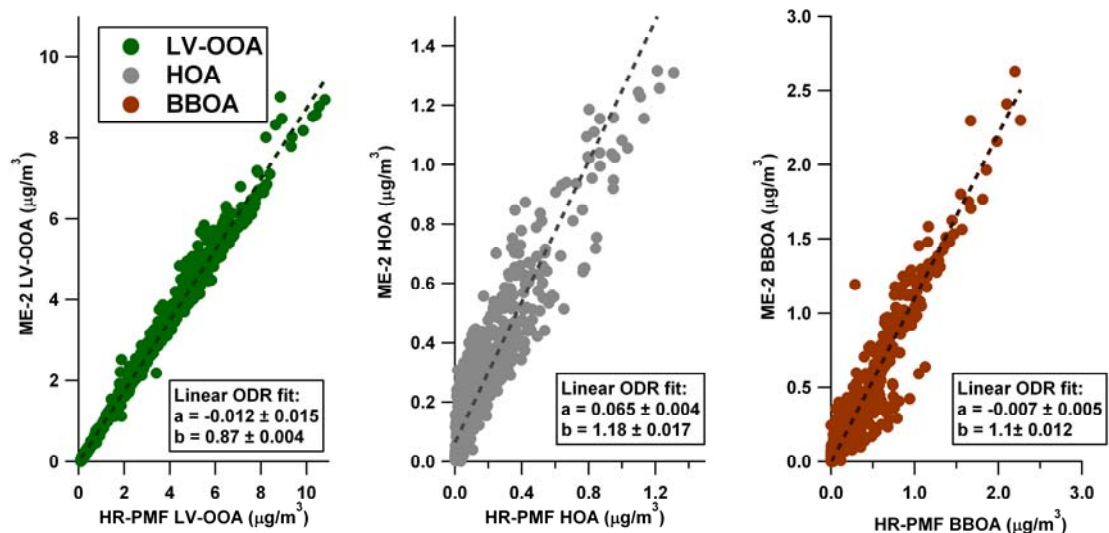

Fig. SI-3.1: Time series comparison of OA sources between the ME-2 solution and the HR-PMF solution for the Montseny spring 2009 campaign.

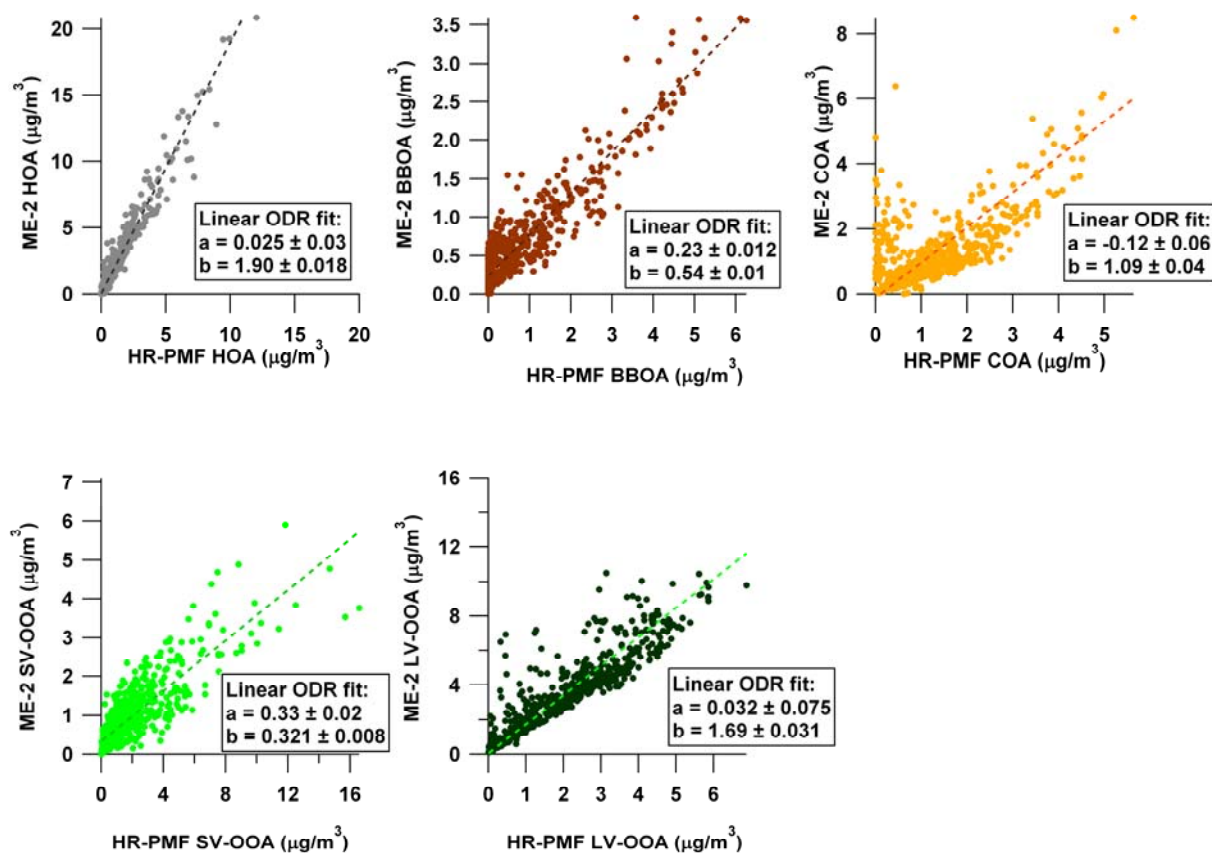

Fig. SI-3.2: Time series comparison of OA sources between the ME-2 solution and the HR-PMF solution for the Barcelona spring 2009 campaign (Mohr et al., 2012).

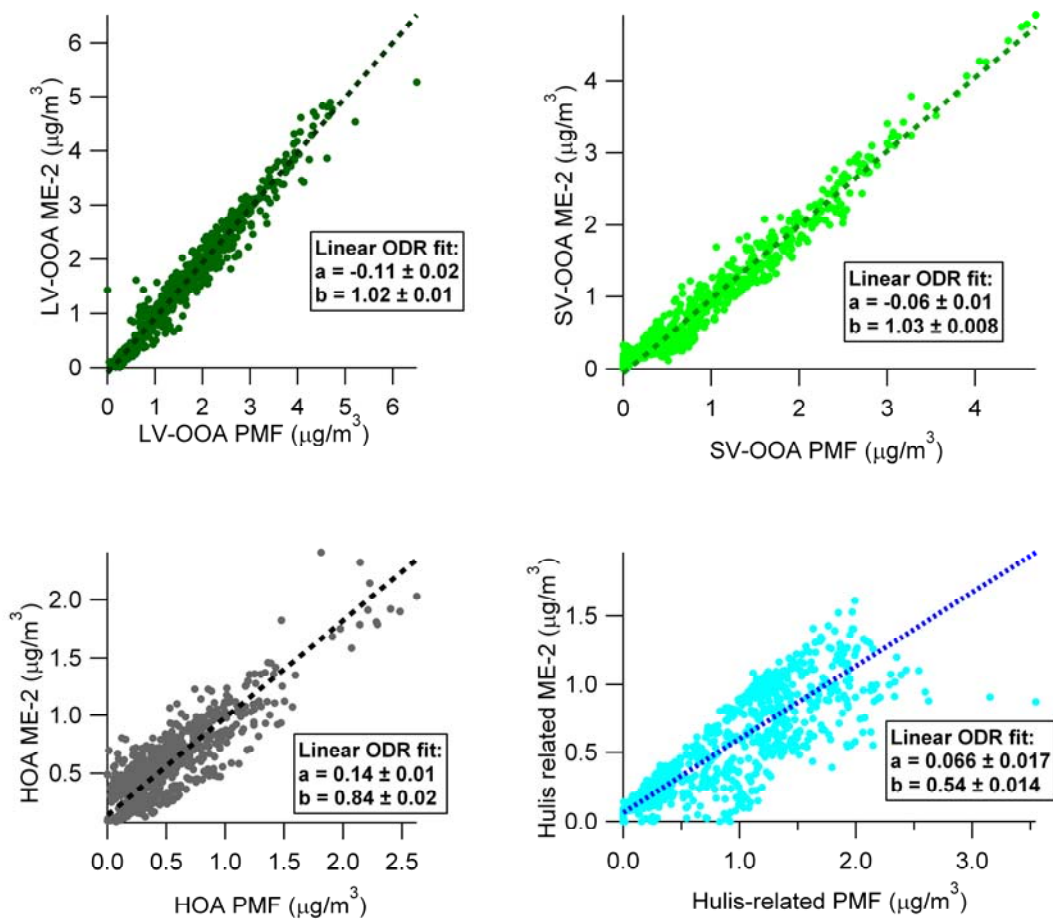

**Fig. SI-3.3: Time series comparison of OA sources between the ME-2 solution and the PMF solution for the Cabauw spring 2008 campaign (Paglione et al., 2013).**

SI-4  $f_{44}$  vs.  $f_{43}$  triangular plot

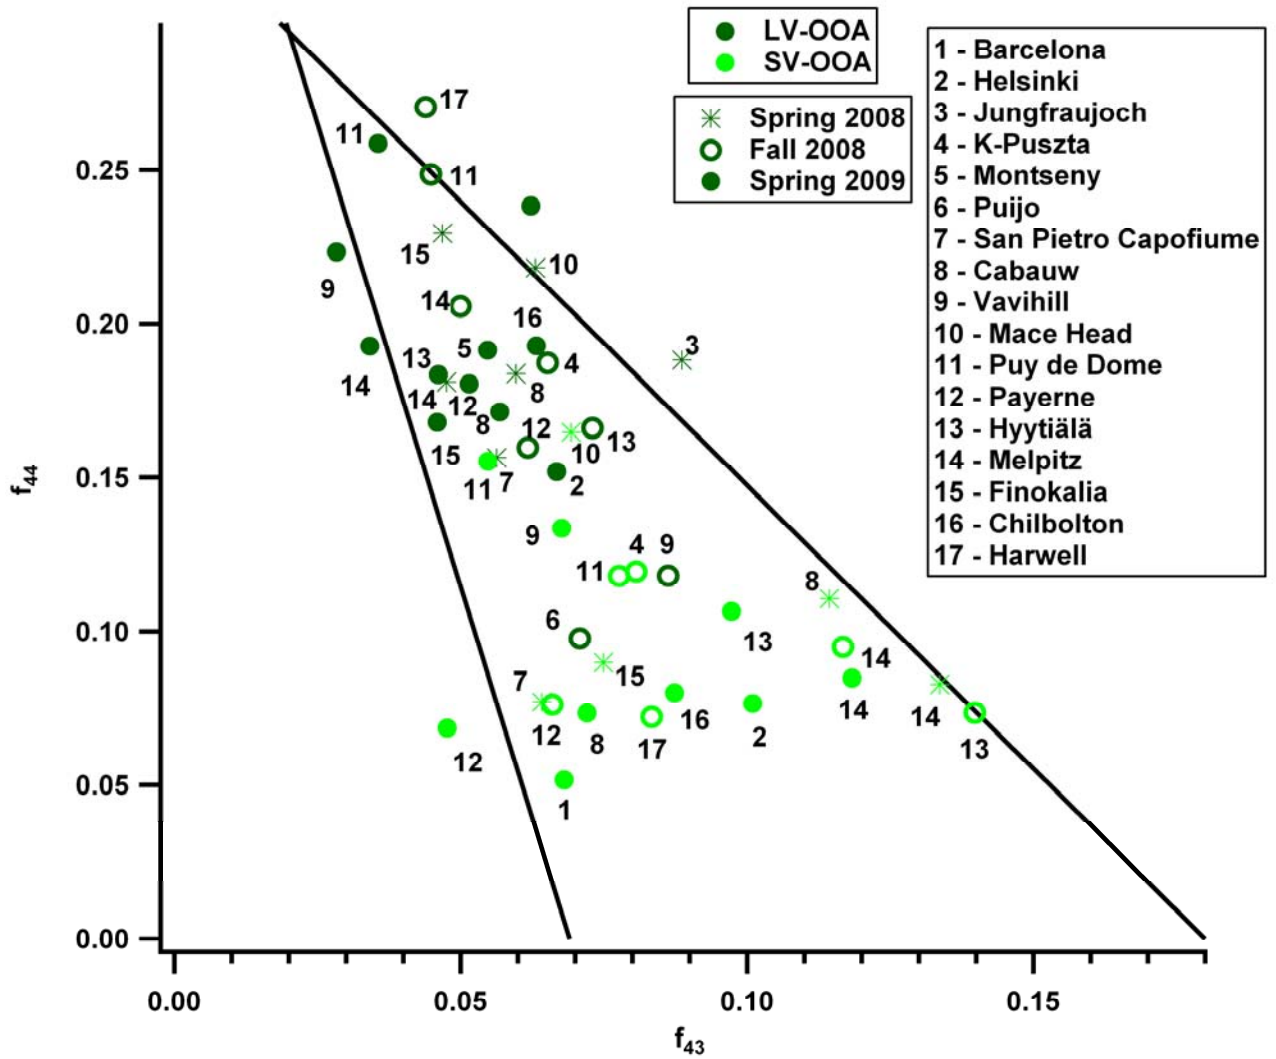

Fig. SI-4:  $f_{44}$  vs.  $f_{43}$  triangle plot.

## SI-5 Reference mass spectra

Figure SI-5 represents the MSA mass spectrum obtained for the Mace Head spring 2008 data, which was then chosen as reference spectrum to be constrained in the ME-2 approach for the Finokalia 2008 and Mace Head 2009 campaigns (Ovadnevaite et al., in prep). Typical peaks of MSA fragmentation in the AMS contribute to this spectrum, such as  $m/z$  15, 45, 65, 78, 79, 96 (Zorn et al., 2008). However this MS contains some interferences from sea salt at  $m/z$  58 and 60.

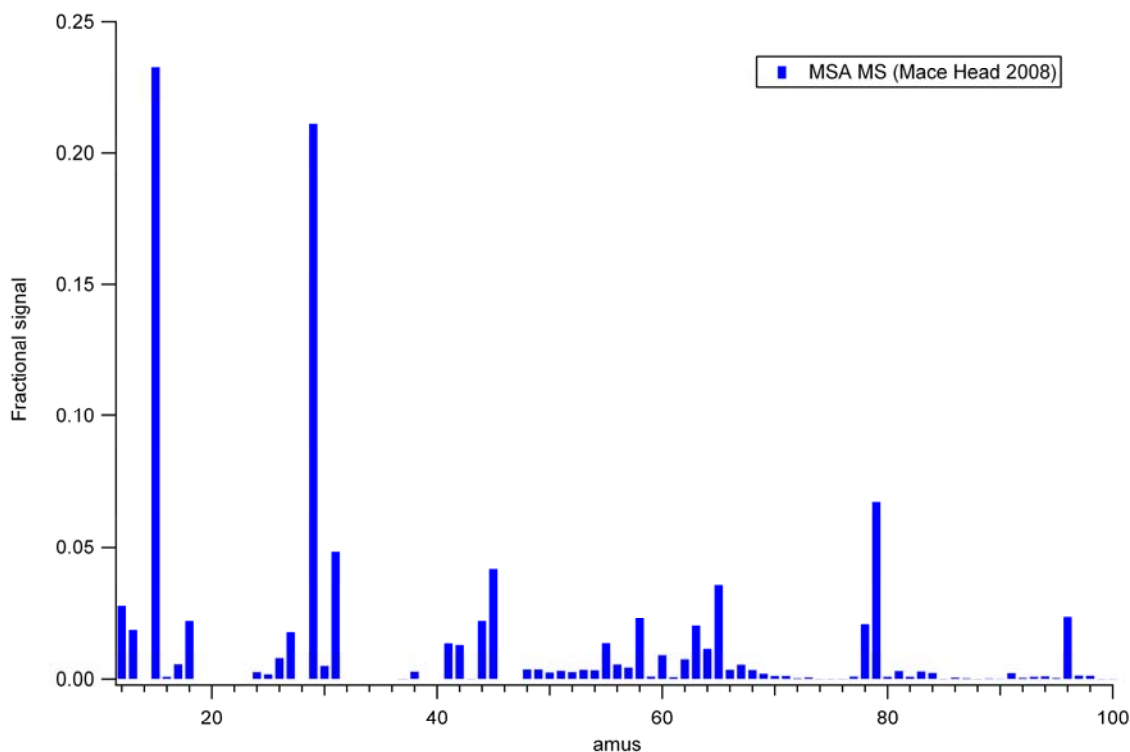

**Figure SI-5: MSA MS obtained for the Mace Head 2008 campaign, chosen as reference MSA MS for all the marine sites.**

## SI-6 Effect of a-priori information on the ME-2 output

In this section we briefly introduce a critical aspect of our work that is the influence of a specific mass spectrum taken as reference when running ME-2 on the source apportionment output. Here we test the effect of fixing the HOA MS presented by Crippa et al. (2013) and the averaged one provided by Ng et al. (2011) for the Northern Hemisphere on the ME-2 output. Table SI-6.1 reports the relative contribution of OA sources to total organics varying the constrained HOA MS. We report these results for a range of a-values (0.05-0.2).

**Table SI-6.1: Comparison of OA source apportionment results (mass fractions) constraining in ME-2 two reference HOA MS (HOA from Crippa et al. (2013) (this study) and from Ng et al. (2011)). Relative contribution of OA sources to total organics is reported for 7 case studies considering an a-value range for HOA of 0.05-0.20. In the table, the first number refers to the solution obtained with an a-value of 0.05 and the second one to with a-value of 0.2.**

|                      | reference MS       | HOA       | BBOA      | SV-OOA    | LV-OOA    | COA       |
|----------------------|--------------------|-----------|-----------|-----------|-----------|-----------|
| <b>BCN spring 09</b> | HOA Ng et al. 2011 | 0.21-0.22 | 0.08-0.08 | 0.19-0.14 | 0.38-0.39 | 0.14-0.16 |
|                      | HOA (this study)   | 0.24-0.25 | 0.09-0.07 | 0.13-0.10 | 0.37-0.34 | 0.17-0.14 |
| <b>MPZ spring 08</b> | HOA Ng et al. 2011 | 0.04-0.07 | -         | 0.44-0.39 | 0.53-0.54 | -         |
|                      | HOA (this study)   | 0.07-0.06 | -         | 0.37-0.34 | 0.56-0.60 | -         |
| <b>MPZ fall 08</b>   | HOA Ng et al. 2011 | 0.10-0.11 | 0.19-0.19 | 0.28-0.23 | 0.42-0.47 | -         |
|                      | HOA (this study)   | 0.08-0.08 | 0.14-0.15 | 0.34-0.31 | 0.44-0.46 | -         |
| <b>MPZ spring 09</b> | HOA Ng et al. 2011 | 0.06-0.07 | 0.11-0.11 | 0.25-0.25 | 0.58-0.57 | -         |
|                      | HOA (this study)   | 0.10-0.10 | 0.17-0.10 | 0.30-0.28 | 0.43-0.52 | -         |
| <b>VAV fall 08</b>   | HOA Ng et al. 2011 | 0.16-0.17 | 0.19-0.16 | -         | 0.69-0.67 | -         |
|                      | HOA (this study)   | 0.20-0.22 | 0.13-0.13 | -         | 0.67-0.65 | -         |
| <b>VAV spring 09</b> | HOA Ng et al. 2011 | 0.11-0.09 | 0.15-0.17 | 0.23-0.34 | 0.51-0.41 | -         |
|                      | HOA (this study)   | 0.10-0.13 | 0.15-0.16 | 0.26-0.20 | 0.49-0.51 | -         |

As shown in Table SI-6.1, varying the constrained reference HOA MS in ME-2 has an influence on the OA source attribution. For most of the cases the variation in the relative contribution of different factors is only a few percent. In order to fully address this critical topic, a more systematic study is planned using more suited datasets with more external constraints to judge which solution performs better or provide a range of results that provide similarly good performance.

Analogous results are reported in Table SI-6.2 for the BBOA MS, where the comparison between the source apportionment results obtained constraining the BBOA MS from Ng et al. (2011) are compared with the ones retrieved constraining the BBOA MS from Crippa et al. (2013). The two input BBOA MS differ mainly for the m/z 44 relative

contribution to the whole spectrum, therefore the redistribution of this mass among all factors (especially BBOA and OOA components) is observed depending on the dataset. A more detailed and complete study concerning the impact of ME-2 input mass spectra on the solution will be provided in a following publication (Canonaco et al., 2014).

**Table SI-6.2: Comparison of OA source apportionment results (mass fractions) constraining in ME-2 two reference BBOA MS (BBOA from Crippa et al. (2013) and from Ng et al. (2011) (this study)). Relative contribution of OA sources to total organics is reported for 6 case studies considering an a-value range for BBOA of 0.20-0.40. In the table, the first and second numbers refer to the solution obtained with an a-value for BBOA of 0.20 and 0.4 for BBOA, respectively, and an a-value of 0.05 for HOA for both cases.**

|                      | reference MS               | HOA       | BBOA      | SV-OOA    | LV-OOA    | COA       |
|----------------------|----------------------------|-----------|-----------|-----------|-----------|-----------|
| <b>BCN spring 09</b> | BBOA (Crippa et al., 2013) | 0.19-0.23 | 0.12-0.12 | 0.21-0.18 | 0.35-0.33 | 0.14-0.15 |
|                      | BBOA (this study)          | 0.25-0.25 | 0.07-0.08 | 0.12-0.11 | 0.39-0.41 | 0.16-0.15 |
| <b>MPZ fall 08</b>   | BBOA (Crippa et al., 2013) | 0.08-0.07 | 0.15-0.16 | 0.27-0.27 | 0.50-0.50 | -         |
|                      | BBOA (this study)          | 0.08-0.08 | 0.14-0.15 | 0.34-0.31 | 0.44-0.46 | -         |
| <b>PAY spring 09</b> | BBOA (Crippa et al., 2013) | 0.05-0.05 | 0.15-0.17 | 0.22-0.22 | 0.57-0.56 |           |
|                      | BBOA (this study)          | 0.08-0.08 | 0.10-0.09 | 0.26-0.20 | 0.57-0.63 |           |
| <b>VAV fall 08</b>   | BBOA (Crippa et al., 2013) | 0.21-0.23 | 0.17-0.14 | -         | 0.62-0.62 | -         |
|                      | BBOA (this study)          | 0.20-0.21 | 0.15-0.13 | -         | 0.65-0.67 | -         |
| <b>VAV spring 09</b> | BBOA (Crippa et al., 2013) | 0.14-0.13 | 0.14-0.16 | 0.22-0.34 | 0.50-0.38 | -         |
|                      | BBOA (this study)          | 0.12-0.11 | 0.14-0.18 | 0.20-0.22 | 0.54-0.50 | -         |
| <b>MSY spring 09</b> | BBOA (Crippa et al., 2013) | 0.14-0.14 | 0.09-0.11 | -         | 0.77-0.75 |           |
|                      | BBOA (this study)          | 0.12-0.12 | 0.09-0.13 | -         | 0.78-0.75 | -         |

## References

Canonaco, F., Baltensperger, U., and Prévôt, A. S. H.: Sensitivity analysis in ME-2 with the toolkit SoFi: Testing various primary and secondary AMS literature profiles, in preparation, 2014.

Crippa, M., DeCarlo, P. F., Slowik, J. G., Mohr, C., Heringa, M. F., Chirico, R., Poulain, L., Freutel, F., Sciare, J., Cozic, J., Di Marco, C. F., Elsasser, M., José, N., Marchand, N., Abidi, E., Wiedensohler, A., Drewnick, F., Schneider, J., Borrmann, S., Nemitz, E., Zimmermann, R., Jaffrezo, J.-L., Prévôt, A. S. H., and Baltensperger, U.: Wintertime aerosol chemical composition and source apportionment of the organic fraction in the metropolitan area of Paris, *Atmos. Chem. Phys.*, 13, 961-981, 2013.

Hildebrandt, L., Engelhart, G. J., Mohr, C., Kostenidou, E., Lanz, V. A., Bougiatioti, A., DeCarlo, P. F., Prevot, A. S. H., Baltensperger, U., Mihalopoulos, N., Donahue, N. M., and Pandis, S. N.: Aged organic aerosol in the Eastern Mediterranean: the Finokalia Aerosol Measurement Experiment-2008, *Atmos. Chem. Phys.*, 10, 4167-4186, 2010.

Hildebrandt, L., Kostenidou, E., Lanz, V. A., Prevot, A. S. H., Baltensperger, U., Mihalopoulos, N., Laaksonen, A., Donahue, N. M., and Pandis, S. N.: Sources and atmospheric processing of organic aerosol in the Mediterranean: insights from aerosol mass spectrometer factor analysis, *Atmos. Chem. Phys.*, 11, 12499-12515, 2011.

Mohr, C., DeCarlo, P. F., Heringa, M. F., Chirico, R., Slowik, J. G., Richter, R., Reche, C., Alastuey, A., Querol, X., Seco, R., Peñuelas, J., Jiménez, J. L., Crippa, M., Zimmermann, R., Baltensperger, U., and Prévôt, A. S. H.: Identification and quantification of organic aerosol from cooking and other sources in Barcelona using aerosol mass spectrometer data, *Atmos. Chem. Phys.*, 12, 1649-1665, 2012.

Ng, N. L., Canagaratna, M. R., Jimenez, J. L., Zhang, Q., Ulbrich, I. M., and Worsnop, D. R.: Real-time methods for estimating organic component mass concentrations from aerosol mass spectrometer data, *Environ. Sci. Technol.*, 45, 910-916, 2011.

Paglione, M., Kiendler-Scharr, A., Mensah, A. A., Finessi, E., Giulianelli, L., Sandrini, S., Facchini, M. C., Fuzzi, S., Schlag, P., Piazzalunga, A., Tagliavini, E., Henzing, J. S., and Decesari, S.: Identification of humic-like substances (HULIS) in oxygenated organic aerosols using NMR and AMS factor analyses and liquid chromatographic techniques, *Atmos. Chem. Phys. Discuss.*, 13, 17197-17252, 2013.

Saarikoski, S., Carbone, S., Decesari, S., Giulianelli, L., Angelini, F., Canagaratna, M., Ng, N. L., Trimborn, A., Facchini, M. C., Fuzzi, S., Hillamo, R., and Worsnop, D.: Chemical characterization of springtime submicrometer aerosol in Po Valley, Italy, *Atmos. Chem. Phys.*, 12, 8401-8421, 2012.

Zorn, S. R., Drewnick, F., Schott, M., Hoffmann, T., and Borrmann, S.: Characterization of the South Atlantic marine boundary layer aerosol using an aerodyne aerosol mass spectrometer, *Atmos. Chem. Phys.*, 8, 4711-4728, 2008.
